# Supplementary material for: World Bank’s financing, priorities, and lending structures for global health
Source: PubMed Central journal article supplement — BMJ. 2017 Aug 31;358:j3339. doi: 10.1136/bmj.j3339 (PMC5594420; doi:10.1136/bmj.j3339), 2017-08-31

# World Bank Funding

## Health, Nutrition, and Population sector

The World Bank was created in 1944 to make money available for rebuilding countries devastated by the second world war. For the next 35 years, the focus of the bank was on infrastructure, but in 1979 it created the Health and Nutrition fund to provide funds for global health.

Over the intervening years, the Health, Nutrition, and Population sector funding has grown considerably to the latest figure of £32bn over the last five years.

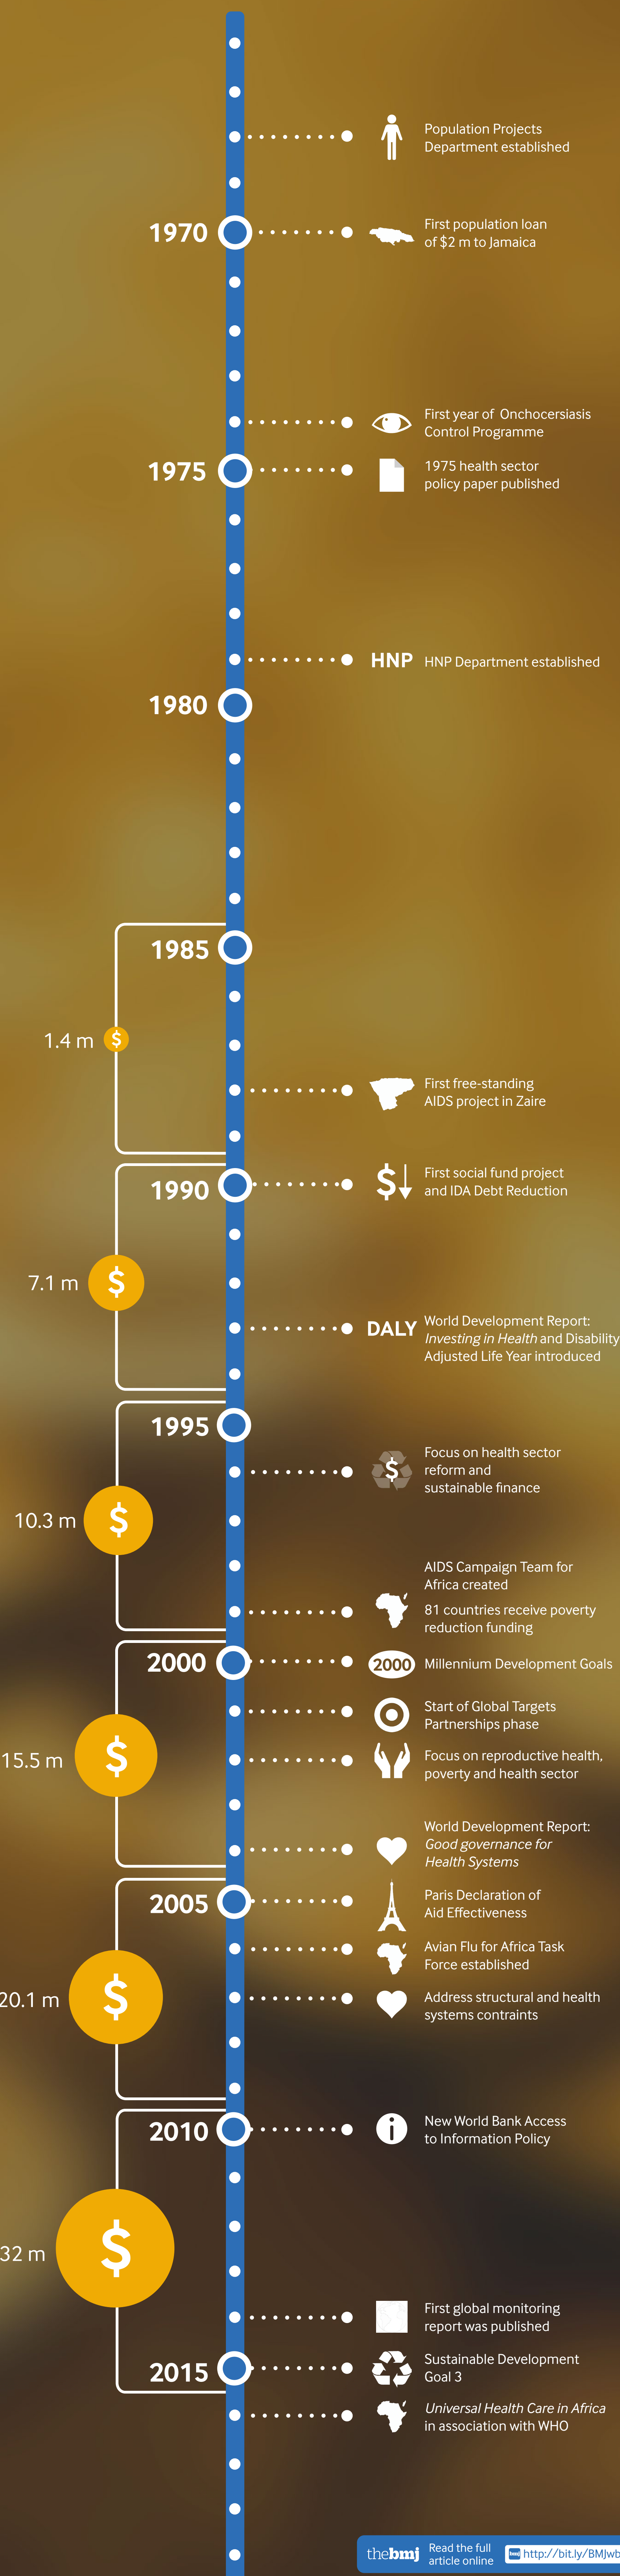

Supplement: srid39910.ww1.pdf [file srid39910.ww1.pdf]
